# Supplementary material for: Calcination of UV shielding nanopowder and its effect on weather resistance property of polyurethane nanocomposite films
Source: Springer Nature journal article supplement (doi:10.1007/s10853-019-03739-7), 2019-06-20
Supplement: MOESM1 [file 16839992]

**Supplementary material**

**XRD patterns:**

The XRD patterns of TZA and TZC nanopowders as well as their PU based nanocomposites with 5wt% loading of the nanopowders have shown in Fig S1.


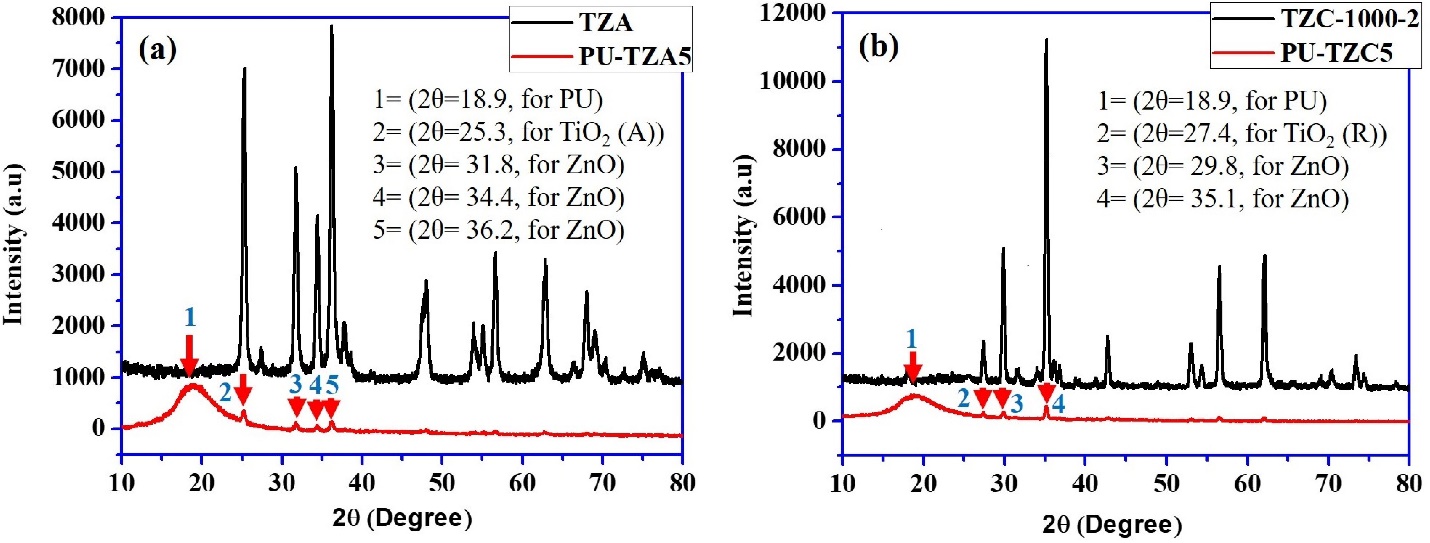


**Fig S1**. XRD patterns for (a) TZA nanopowder and PU-TZA5 nanocomposite (b) TZC nanopowder and PU-TZC5 nanocomposite

**Elemental analysis by EDX:**

The weight percentage and atom percentage of different elements present in UV shielding nanopowder were quantified using EDX mapping attached with an SEM, Zeiss EVO 50. The powder samples were coated with a thin layer of carbon using a sputter coater prior to EDX analysis. A silicon drift detector (SDD) with an energy resolution of 127 eV at Mn-Kα was used to determine the EDX spectrum of the carbon-coated samples by area scan. The elemental compositions of two types of UV shielding nanopowder as analyzed by EDX mapping are shown in Fig. S2. The EDX spectrum confirmed the presence of Zn, Ti and O elements in UV shielding nanopowder, while the percentage of the elements changed slightly after calcination. A slight depletion of oxygen content was observed in calcinated nanopowder, due to removal of moisture during calcination at high temperature.


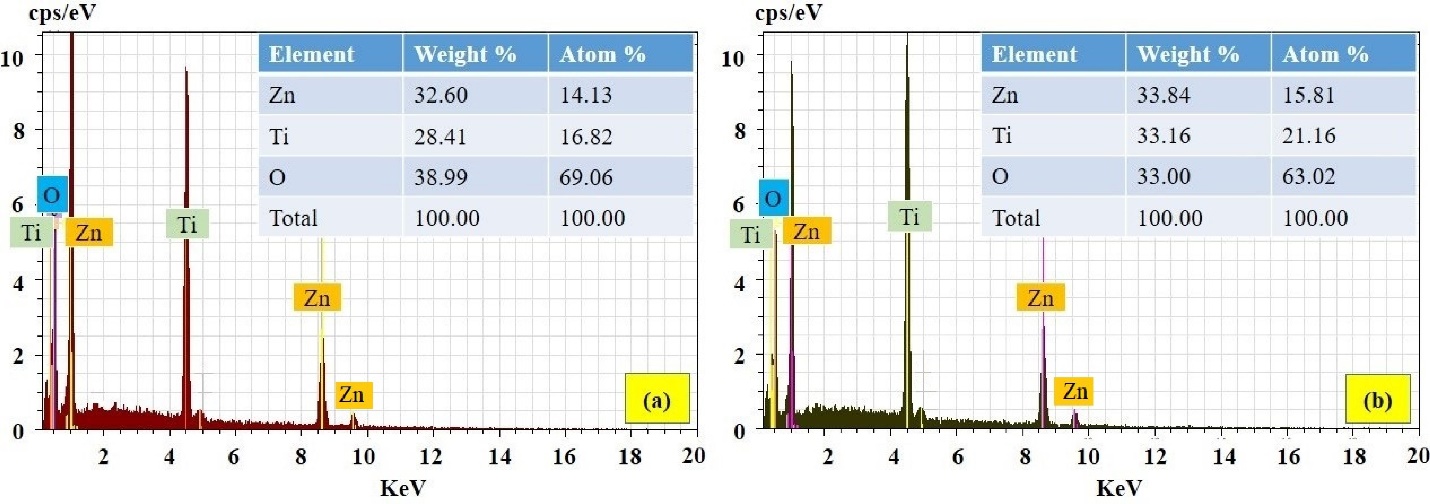


# Fig. S2: EDX spectrum of the UV shielding nanopowder: (a) TZA and (b) TZC-1000-2.

**Photooxidative index (PI) and carbonyl index (CI):**

The degree of broadening in area under different peaks were analysed by calculating the value of PI and CI values. The area under C-H stretching peak was considered as internal standard and photooxidative index (PI) was calculated according to the following formula [1]:

PI= ( ………………..(i)

Where X is the area under the peak assigned for O-H and N-H stretching vibration (3650-3100 cm–1) and Y is the C-H stretching peak area (3000-2700 cm–1).

CI values were calculated for quantitative analysis of the degree of broadening of C=O stretching peak, according to the following formula, considering the area under C-H stretching peak (3000-2700 cm–1) as an internal standard [1]:

CI= ……………………………………… (ii)

Where Z is the area under the peak (1780-1600 cm–1) assigned to C=O stretching vibration.

The PI and CI values were increased after 300h UV exposure (Table S1), due to photooxidative degradation of PU and it was in following order:

PU-TZA5>Neat PU>PU-TZC5

It is indicating the highest photooxidative degradation for PU-TZA5 and lowest for PU-TZC5.

Table S1. The ratios of different peak absorbencies (Area under Peaks), PI and CI values calculated from the FTIR Spectra represented in Fig. 6.

| Sample | AOH,NH | ACH | AOH,NH/ACH | PI | ACO | CI | Increase in CI |
| --- | --- | --- | --- | --- | --- | --- | --- |
| PU | 1227.99 | 3434.03 | 0.35 | 0.13 | 2511.48 | 0.73 | 0.19 |
| PU-3E | 1589.53 | 3281.61 | 0.48 | 3033.17 | 0.92 |
| PU-TZA5 | 1372.42 | 3099.74 | 0.44 | 0.18 | 2056.28 | 0.66 | 0.33 |
| PU-TZA5-3E | 1929.73 | 3076.56 | 0.63 | 3069.52 | 1.00 |
| PU-TZC5 | 1329.3 | 3282.46 | 0.40 | 0.04 | 2431.72 | 0.74 | 0.06 |
| PU-TZC5-3E | 1411.94 | 3148.73 | 0.45 | 2518.09 | 0.80 |

**SEM: Analysis of change in surface morphology of films after UV exposure**

A scanning electron microscopy (SEM), ZEISS Evo 18 (Special edition) was utilized to observe the surface morphology of the films before and after exposure in accelerated artificial weathering, while the experiment was carried out with an accelerating voltage of 20 kV. The surface of neat PU films was quite smooth before exposure (Fig. S3a), while it became very rough and micro cracks appeared on the surface (Fig. S3b) after 300h exposure in accelerated artificial weathering due to degradation of PU. The cracks were more clearly visible in the magnified image of the surface (Fig. S3c).


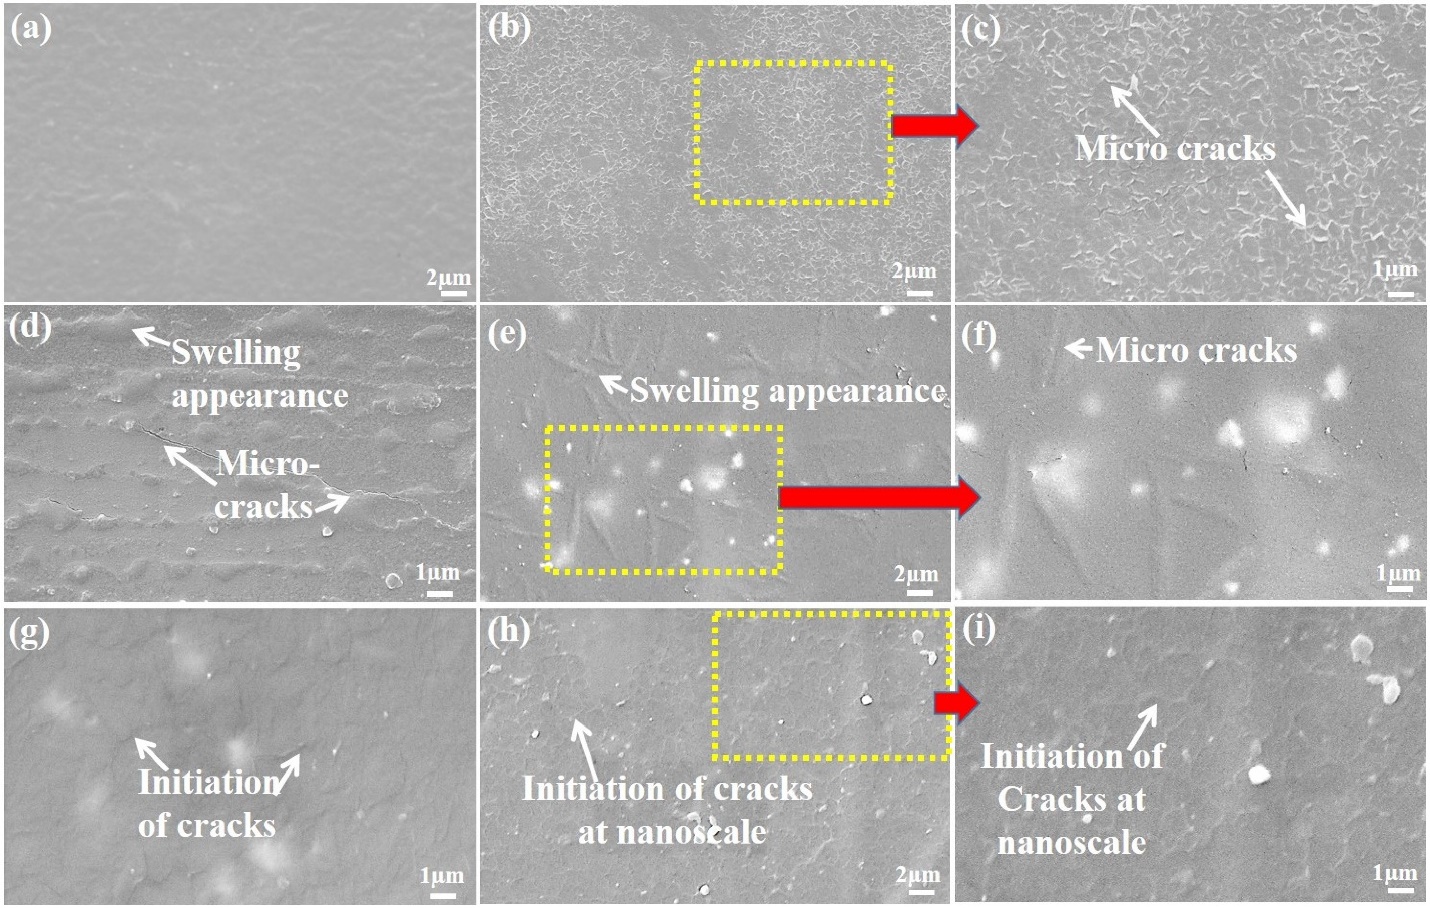


Fig. S3: SEM images of neat PU film before exposure (a) and after 300h exposure (b-c), PU-TZA3 film after 300h exposure (d), PU-TZA5 film after 300h exposure (e-f), PU-TZC1 film after 300h exposure (g), PU-TZC3 film after 300h exposure (h-i).

The PUNC films reinforced with TZA nanopowder showed almost no improvement in weather resistance compared to neat PU film, showing swelling like appearance and microcracks on the film surface after 300h exposure (Fig. S3(d-f)). The long micro cracks were more clearly visible on the magnified image of the surface of PU-TZA5 nanocomposite film (Fig. S3(f)). It might be the indication of more deterioration of weather resistance due to accelerated photocatalytic degradation of PU in presence of anatase phase enriched TiO2 nanopowder. However, the surface of nanocomposite films reinforced with TZC nanopowder was quite smooth, indicating improved weather resistance property. At 1wt% loading of TZC nanopowder, few microcracks were found (Fig. S3(g)), indicating that lower loading of nanopowder is not sufficient to improve the weather resistance of PU films. However, at 3wt% or more loading of TZC nanopowder, no microcracks were found, only in few places nanoscale roughness was generated which might be indication of the initiation of nanoscale cracks (Fig. S3(h-i). Thus, the TZC reinforced PUNC films showed improved and much better weather resistance compared to neat PU films (Fig. S3(a-c)) and also the PUNC films reinforced with TZA nanopowder (Fig. S3(d-f)). This is because of higher UV resistance potential of rutile phase enriched TiO2 nanoparticles and ZnO nanoparticles present in TZC nanopowder resulting from calcination of TZA nanopowder.

**Surface morphology related data of PU based films analysed by AFM**:

Table S2: AFM results, indicating the extension in Z-direction and surface roughness values for different film samples (before and after UV exposure), as shown in Fig. 7

| Sample | Extension in Z-direction | RMS surface roughness, Rq (nm) | Average surface roughness, Ra (nm) |
| --- | --- | --- | --- |
| Neat PU | -1.4 to 1.3 | 0.39 | 0.30 |
| PU-3E | -96.6 to 122.1 | 28.80 | 22.30 |
| PU-TZA3-3E | -102.0 to 129.4 | 31.50 | 25.10 |
| PU-TZC3-3E | -42.8 to 44.5 | 12.70 | 9.22 |

**Reference:**

1. H. Wang, Y. Wang, D. Liu, Z. Sun, H. Wang, (2014) Effects of additives on weather-resistance properties of polyurethane films exposed to ultraviolet radiation and ozone atmosphere. J Nanomater 2014:1-7.
